# Supplementary material
Source: Springer Nature journal article supplement (https://www.springerprofessional.de/resource/supplementary/13638_2011_558_MOESM7_ESM.pdf/11897626)
Supplement: MOESM7 [file 11897626]

|                             | Metrics      | Monitoring | OSI Layer    | Protocol | Bandwidth | Loss Ratio | Load Aware | Interflow | Intraflow | Isotonic | Asymmetry | Simulation |
|-----------------------------|--------------|------------|--------------|----------|-----------|------------|------------|-----------|-----------|----------|-----------|------------|
| Simple                      | ETX          | Active     | Network      | EXOR     | ✓         |            |            |           |           | ✓        | ✓         | Test Bed   |
|                             | mETX         | Active     | Network      | EXOR     | ✓         |            |            |           |           | ✓        | ✓         | Roof net   |
|                             | ENT          | Active     | Network,Link | EXOR     | ✓         |            |            |           |           | ✓        | ✓         | Roofnet    |
|                             | ETT          | Passive    | Network      | LQSR     | ✓         | ✓          |            |           |           | ✓        | ✓         | Test Bed   |
|                             | iETT         | Active     | Network      | DSR      | ✓         | ✓          |            |           |           | ✓        | ✓         | NS-2       |
|                             | MD           | Active     | Network      | MD-OLSR  | ✓         | ✓          |            |           |           | ✓        |           | NS-2       |
| Interference Aware          | WCETT        | Passive    | Wentwork     | MR-LQSR  | ✓         | ✓          |            |           | ✓         |          | ✓         | Test Bed   |
|                             | MIC          | Passive    | Network      | LIBRA    | ✓         | ✓          |            | ✓         | ✓         | ✓        | ✓         | NS-2       |
|                             | Airtime Cost | Passive    | Link         | OLSR     | ✓         | ✓          |            | ✓         |           | ✓        |           | Test Bed   |
|                             | iAWARE       | Passive    | Link         | AODV     | ✓         | ✓          |            | ✓         | ✓         |          | ✓         | Test Bed   |
|                             | INX          | Passive    | Link         | AODV     | ✓         | ✓          |            | ✓         |           | ✓        | ✓         | NS-2       |
| Load Aware                  | LAETT        | Passive    | Network      | OLSR     | ✓         | ✓          | ✓          |           |           | ✓        | ✓         | Test Bed   |
|                             | WCETT-LB     | Passive    | Network      | OLSR     | ✓         | ✓          | ✓          |           | ✓         |          | ✓         | Ns-2       |
| Load and Interference Aware | RARE         | Passive    | Network,Link | DSR      | ✓         | ✓          | ✓          | ✓         |           | ✓        |           | Test Bed   |
|                             | CATT         | Passive    | Network,Link | OLSR     | ✓         | ✓          | ✓          | ✓         | ✓         | ✓        | ✓         | Test Bed   |
|                             | ILA          | Passive    | Network,Link | AODV     | ✓         | ✓          | ✓          | ✓         | ✓         | ✓        | ✓         | NS-2       |
|                             | CWB          | Passive    | Network,Link | OLSR     | ✓         | ✓          | ✓          | ✓         |           | ✓        |           | NS-2       |
|                             | MIND         | Passive    | Network,Link | OLSR     | ✓         | ✓          | ✓          | ✓         | ✓         | ✓        |           | NS-2       |
|                             | C2WB         | Passive    | Network,Link | OLSR     | ✓         | ✓          | ✓          | ✓         |           | ✓        |           | NS-2       |
